# Supplementary material for: Principal component analysis to assess the composition and fate of impurities in a large river-embedded reservoir: Qingcaosha Reservoir
Source: Royal Society of Chemistry journal article supplement (doi:10.1039/c3em00154g), 2013-01-01
Supplement: c3em00154g.pdf [file c3em00154g.pdf]

## **Supporting Information**

### **Principal component analysis to assess the composition and fate of impurities in a large river-embedded reservoir: Qingcaosha Reservoir**

Hua-Se OU<sup>1</sup>, Chao-Hai WEI\*<sup>1</sup>, Yang DENG<sup>2</sup>, Nai-Yun GAO<sup>3</sup>

1. The Key Lab of Pollution Control and Ecosystem Restoration in Industry Clusters, Ministry of Education, College of Environment and Energy, South China University of Technology, Higher Education Mega Center, Guangzhou, 510006, China; 2. Department of Earth and Environmental Studies, Montclair State University, Montclair, New Jersey, 07043, United States; 3. State Key Laboratory of Pollution Control and Resources Reuse, College of Environmental Science and Engineering, Tongji University, Shanghai, 200092, China.

# Temporal variation of PCA factor scores at Site 2 and Site 4 in summer.

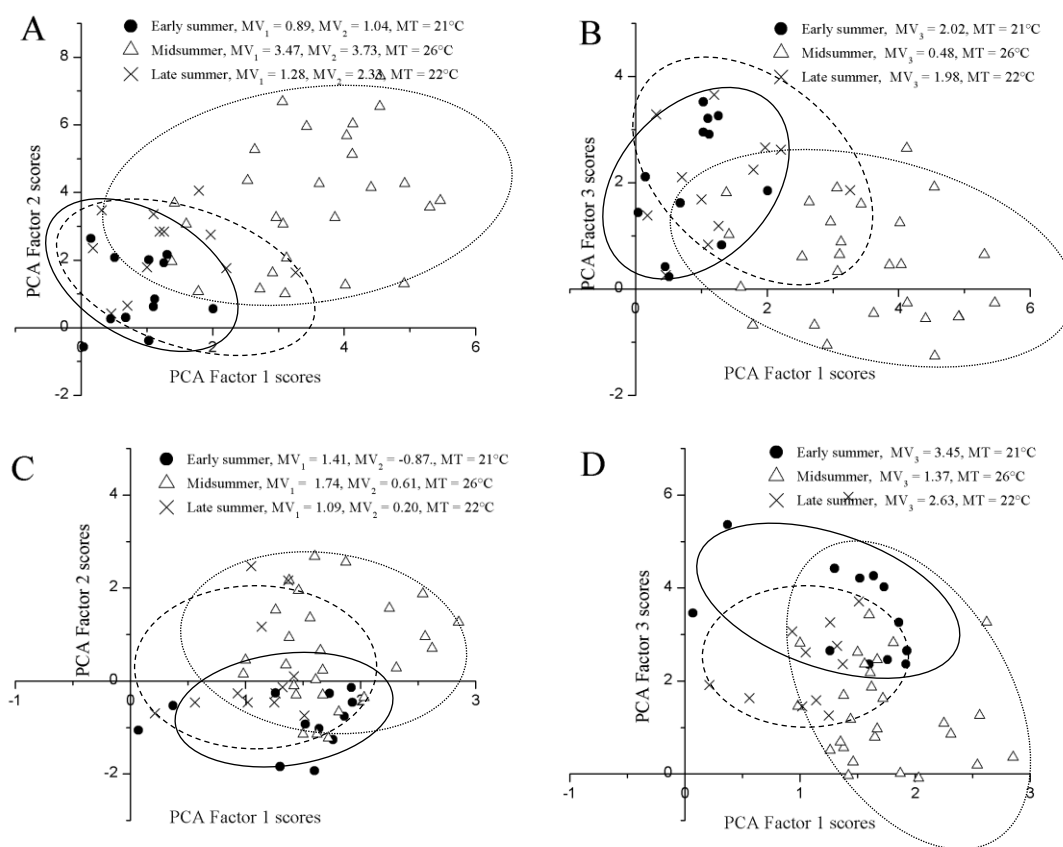

Fig. S1 Scatter plots of PCA factor scores at Site 2 and Site 4.

(A-B) spatial variations of PCA factor scores at Site 1. (C-D) spatial variations of PCA factor scores at Site 3.  $MV_1$ ,  $MV_2$  and  $MV_3$  indicate the mean values of Factor 1, 2 and 3 scores, respectively.  $MT$  is the mean water temperature. The 90% confidence ellipses of PCA factors are presented in PCA scatter plots. Solid lines represents early summer sample, dot lines for midsummer sample and dash lines for late summer sample.
